# Supplementary material for: Switchable dielectric constant, structural and vibrational studies of double perovskite organic–inorganic hybrids: (azetidinium)2[KCr(CN)6] and (azetidinium)2[KFe(CN)6]
Source: Royal Society of Chemistry journal article supplement (doi:10.1039/d2ce00270a), 2022-01-01
Supplement: d2ce00270a1.pdf [file d2ce00270a1.pdf]

Supplementary Materials

**Switchable dielectric constant, structural and vibrational studies of double perovskite organic-inorganic hybrids: (azetidinium)<sub>2</sub>[KCr(CN)<sub>6</sub>] and (azetidinium)<sub>2</sub>[KFe(CN)<sub>6</sub>]**

Magdalena Rok<sup>†a</sup>, Marcin Moskwa<sup>a</sup>, Joanna Hetmańczyk<sup>b</sup>, Łukasz Hetmańczyk<sup>b</sup>, Grażyna Bator<sup>a</sup>

<sup>a</sup>Faculty of Chemistry, University of Wrocław, 14 F. Joliot – Curie, 50-383 Wrocław, Poland

<sup>b</sup>Faculty of Chemistry, Jagiellonian University in Kraków, Gronostajowa 2, 30-387 Kraków, Poland

**CAPTIONS OF FIGURES**

- Fig. S1.** Powder X-ray diffraction pattern for **AZEF**e and **AZECr** at room-temperature and calculated ones based on phase I (high-temperature) single-crystal structures.....2
- Fig. S2.** The results of the simultaneous TGA/DSC analyses for a) **AZECr** (sample mass  $m = 10.958$  mg, 5K/min.) and b) **AZEF**e (sample mass  $m = 9.594$  mg, 5K/min.). .....3
- Fig. S3.** The group–subgroup relation of the PT transition between HT and the LT phases of **AZECr**. The red numbers indicate total symmetry elements. ....4
- Fig. S4.** Experimental Far Infrared spectra (FT-FIR) for **AZECr** and **AZEF**e at two extreme temperatures in the wavenumber range between 550 and 80  $\text{cm}^{-1}$ . .....5
- Fig. S5.** FT-FIR spectra in the wavenumber range of 550–80  $\text{cm}^{-1}$  at different temperatures (during cooling of the **AZECr** sample). The spectra in the high and low temperature phases were marked in red and blue colours, respectively. ....6
- Fig. S6.** FT-FIR spectra in the wavenumber range of 550–80  $\text{cm}^{-1}$  at different temperatures (during cooling of the **AZEF**e sample). The spectra in the high and low temperature phases were marked in magenta and violet colours, respectively. ....7
- Fig. S7.** Experimental Middle Infrared spectra (FT-MIR) for **AZECr** and **AZEF**e at two extreme temperatures in the wavenumber range between 4000 and 750  $\text{cm}^{-1}$ . .....8

**CAPTIONS OF TABLES**

- Table S1.** Crystal data and brief information about structure refinement results for **AZECr-HT**, **AZECr-LT**, and **AZEF**e-HT at 210 K, 120, and 240 K, respectively.....9
- Table S2.** Hydrogen-bond geometry [ $\text{\AA}$ ,  $^\circ$ ] for **AZECr** at 120 K (**AZECr-LT**). .....10
- Table S3.** Selected bond lengths and the shortest Cr...K distances ( $\text{\AA}$ ) for **AZECr-LT** at 120 K. ....10
- Table S4.** Comparison of the band positions in the infrared (FT-FIR, FT-MIR) spectra at the 290 K for **AZECr** and **AZEF**e compounds (vs-very strong, s-strong, m-medium, br-broad, sh-shoulder, w-weak, vw-very weak). .....10

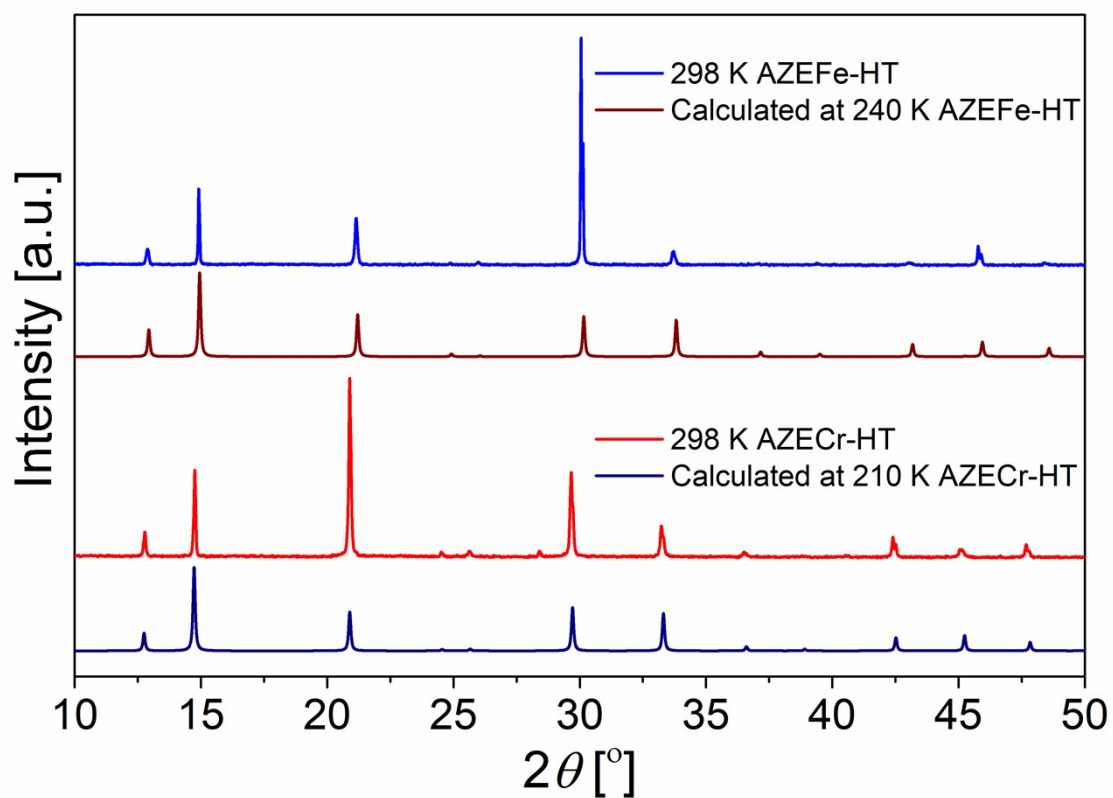

**Fig. S1.** Powder X-ray diffraction pattern for **AZEFe** and **AZECr** at room-temperature and calculated ones based on phase I (high-temperature) single-crystal structures.

a)

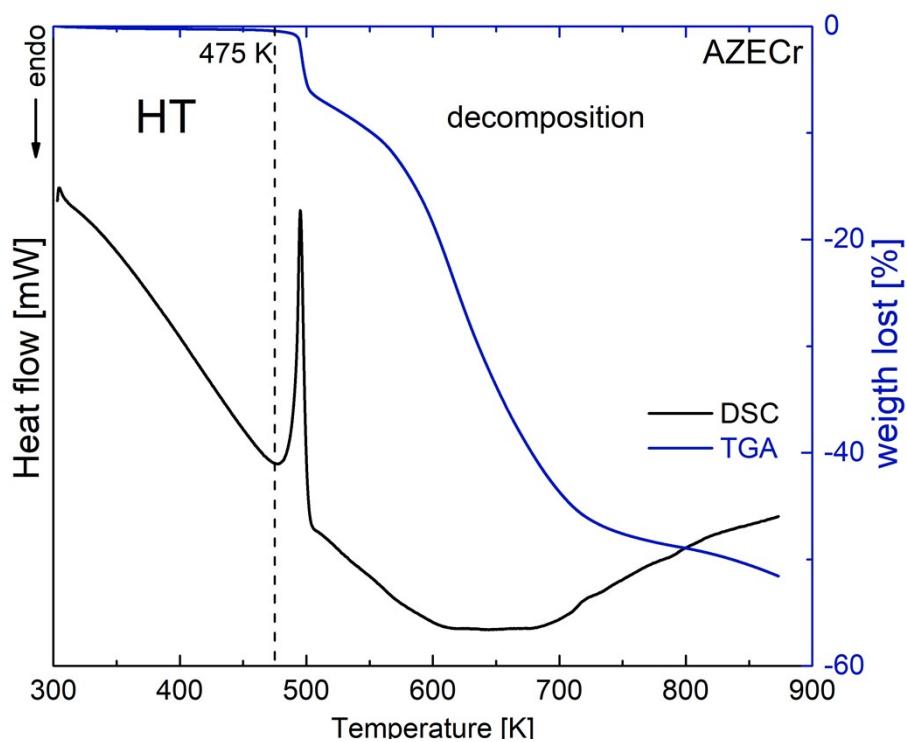

b)

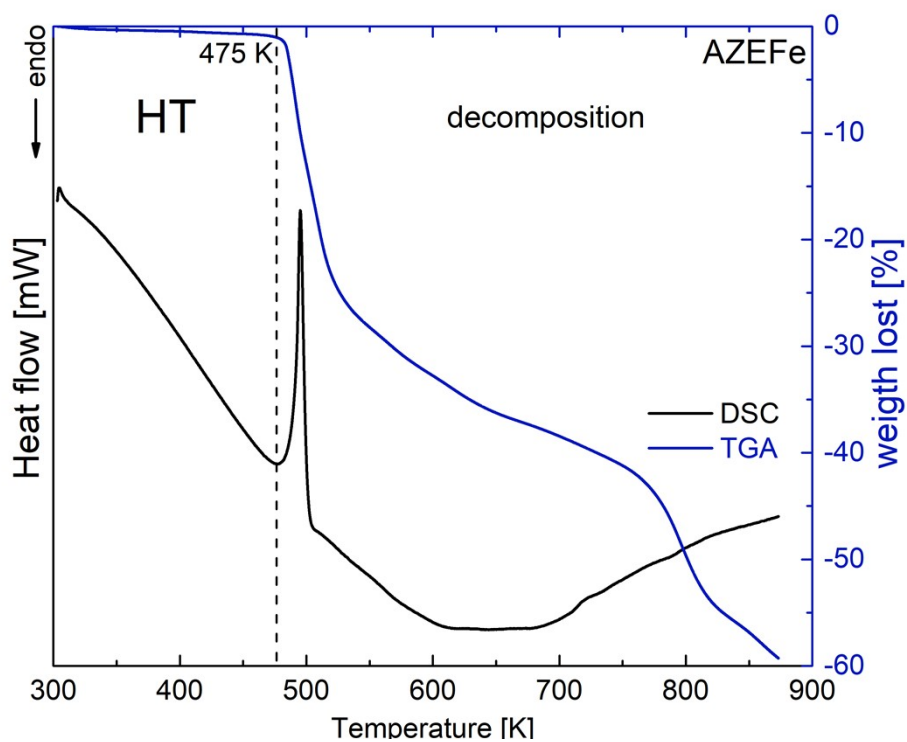

**Fig. S2.** The results of the simultaneous TGA/DSC analyses for a) **AZECr** (sample mass  $m = 10.958$  mg, 5K/min.) and b) **AZEFe** (sample mass  $m = 9.594$  mg, 5K/min.).

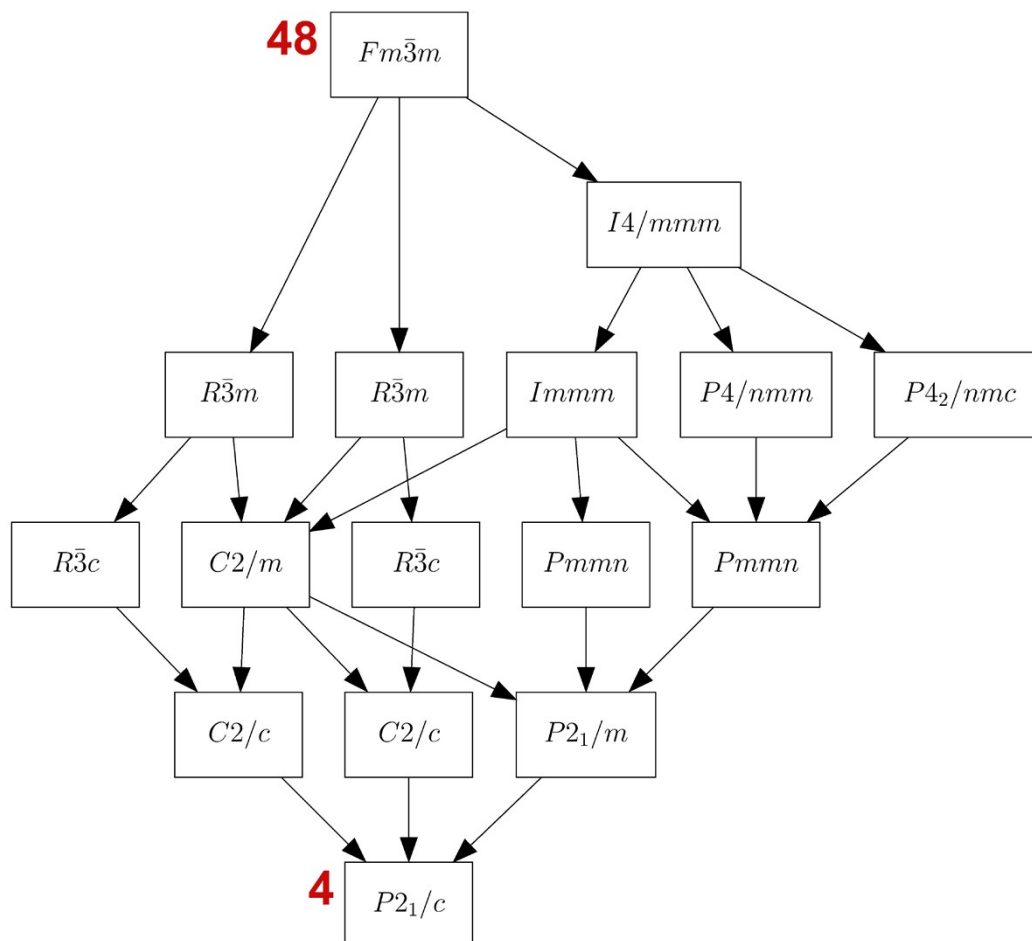

**Fig. S3.** The group-subgroup relation of the PT transition between HT and the LT phases of AZECr. The red numbers indicate total symmetry elements.

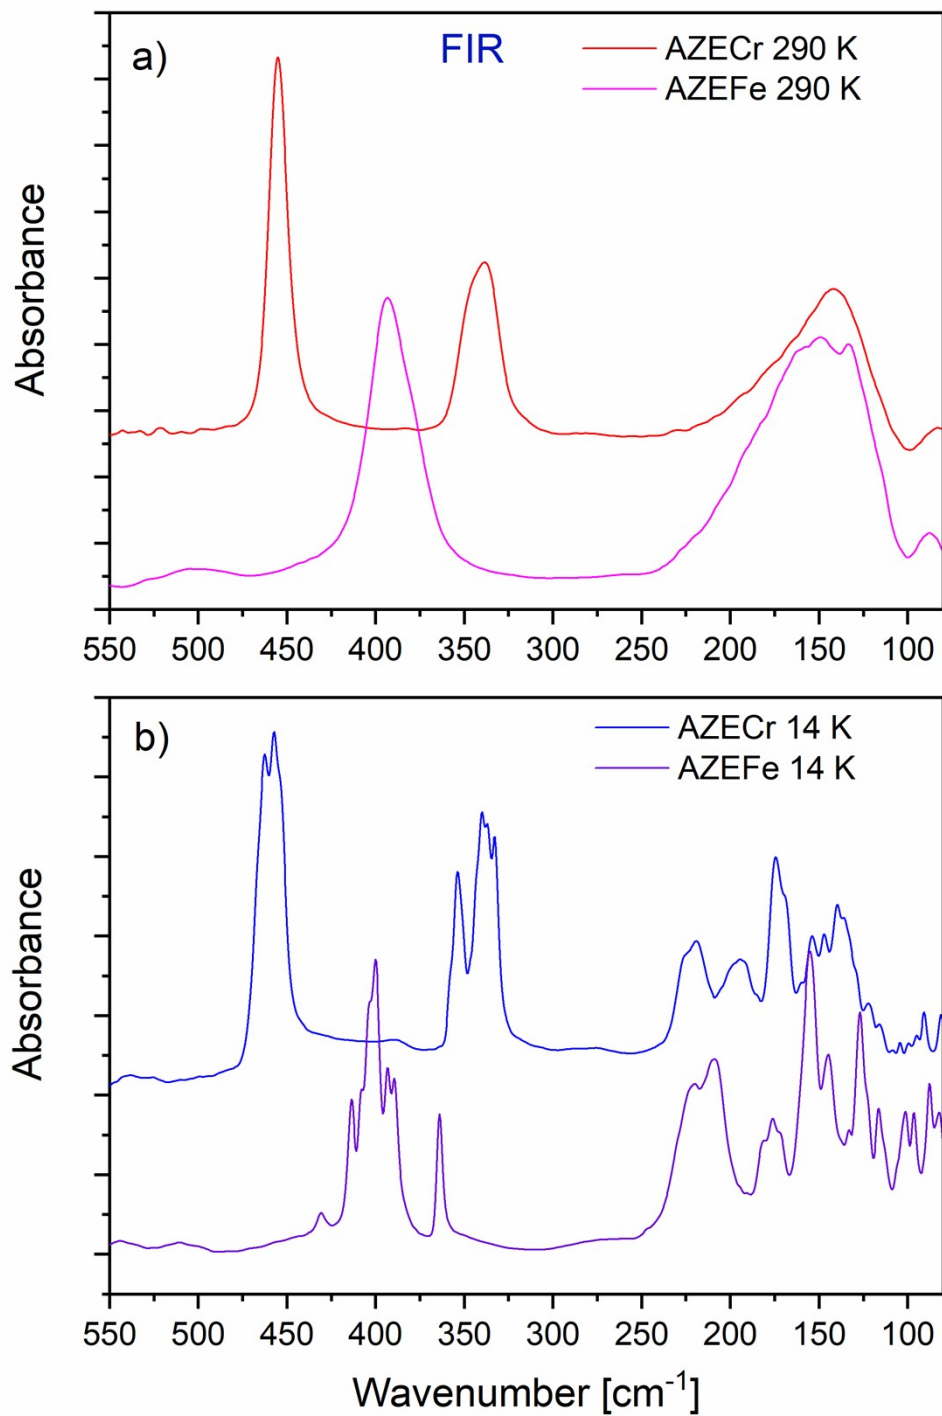

**Fig. S4.** Experimental Far Infrared spectra (FT-FIR) for **AZECr** and **AZEFe** at two extreme temperatures in the wavenumber range between 550 and 80 cm<sup>-1</sup>.

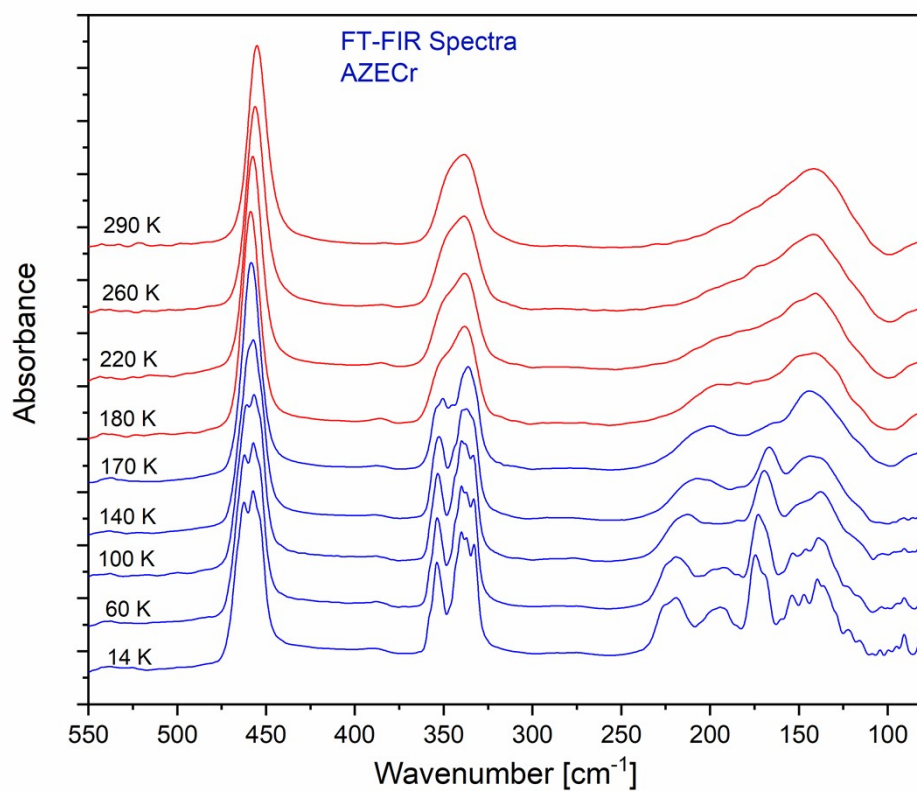

**Fig. S5.** FT-FIR spectra in the wavenumber range of 550–80 cm<sup>-1</sup> at different temperatures (during cooling of the **AZECr** sample). The spectra in the high and low temperature phases were marked in red and blue colours, respectively.

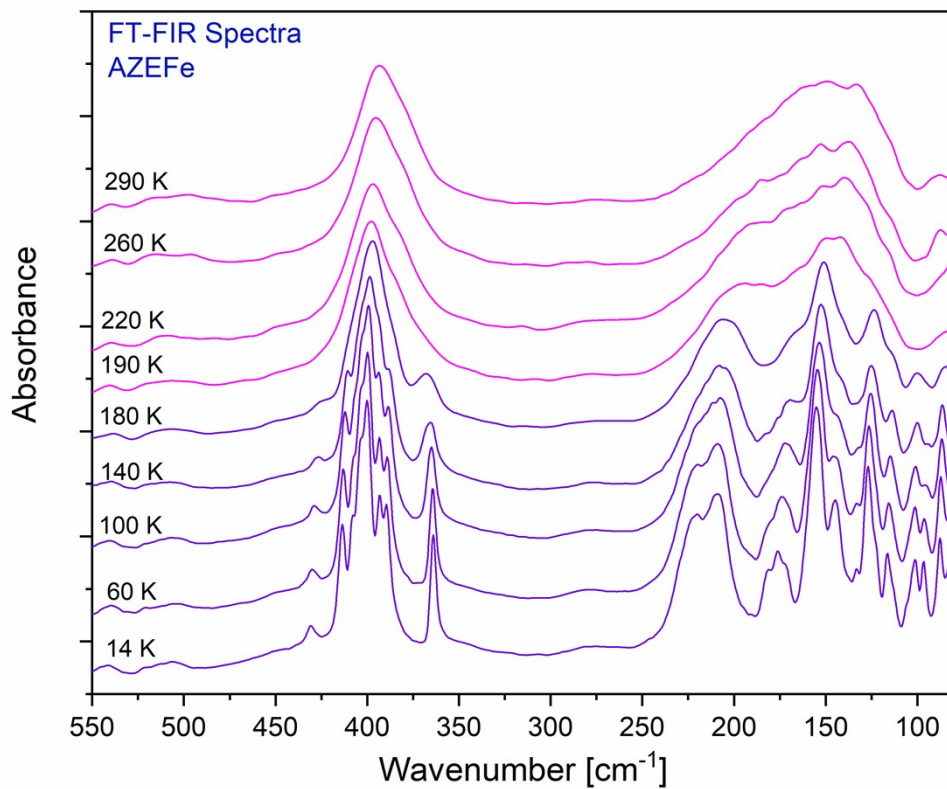

**Fig. S6.** FT-FIR spectra in the wavenumber range of 550–80  $\text{cm}^{-1}$  at different temperatures (during cooling of the **AZEFe** sample). The spectra in the high and low temperature phases were marked in magenta and violet colours, respectively.

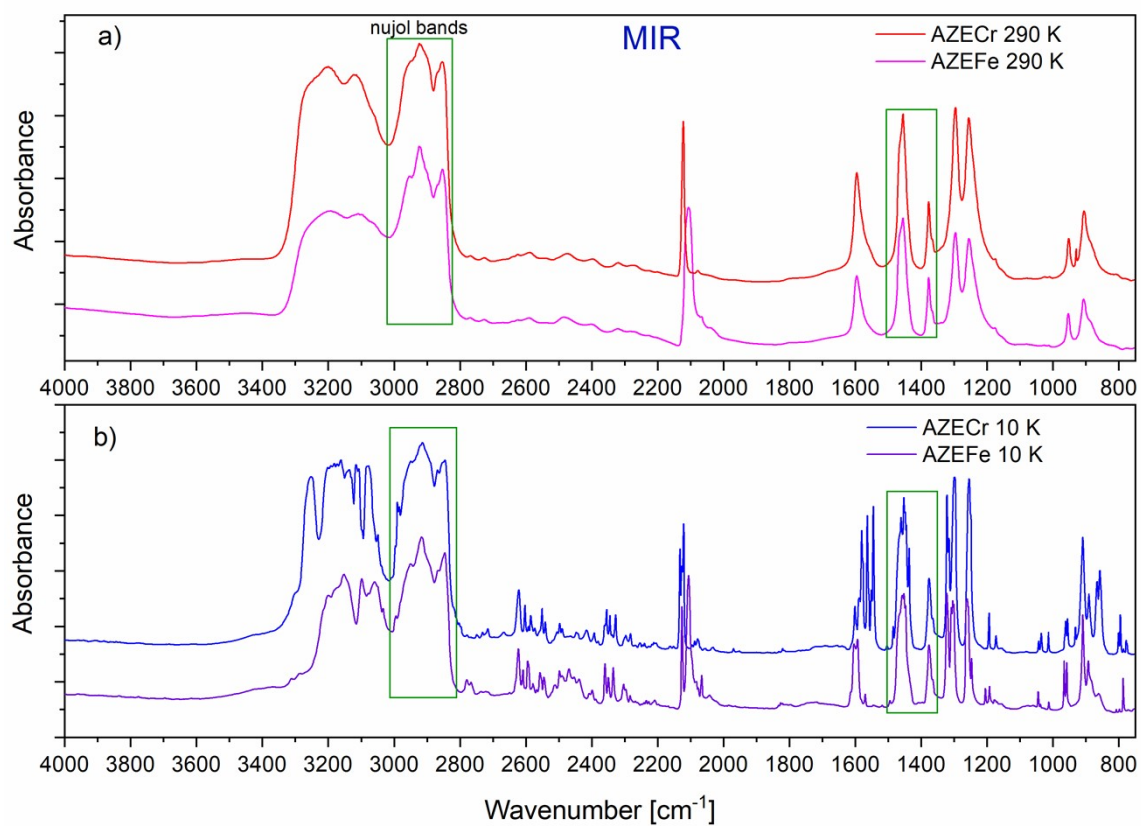

**Fig. S7.** Experimental Middle Infrared spectra (FT-MIR) for **AZECr** and **AZEFe** at two extreme temperatures in the wavenumber range between 4000 and 750 cm<sup>-1</sup>.



**Table S1.** Crystal data and brief information about structure refinement results for **AZECr-HT**, **AZECr-LT**, and **AZFe-HT** at 210 K, 120, and 240 K, respectively.

|                                                                            | <b>AZECr-HT</b>                                                        | <b>AZECr-LT</b>                      | <b>AZFe-HT</b>                                                         |
|----------------------------------------------------------------------------|------------------------------------------------------------------------|--------------------------------------|------------------------------------------------------------------------|
| <b>Crystal data</b>                                                        |                                                                        |                                      |                                                                        |
| Chemical formula                                                           | [C <sub>3</sub> H <sub>8</sub> N] <sub>2</sub> [KCr(CN) <sub>6</sub> ] |                                      | [C <sub>3</sub> H <sub>8</sub> N] <sub>2</sub> [KFe(CN) <sub>6</sub> ] |
| $M_r$                                                                      | 363.43                                                                 |                                      | 367.28                                                                 |
| Crystal system, space group                                                | Cubic, $Fm\bar{3}m$                                                    | Monoclinic, $P2_1/c$                 | Cubic, $Fm\bar{3}m$                                                    |
| Temperature (K)                                                            | 210(2)                                                                 | 120(2)                               | 240(2)                                                                 |
| $a, b, c$ (Å)                                                              | 12.018(2),<br>12.018(2),<br>12.018(2)                                  | 14.120(3),<br>8.627(3),<br>14.871(2) | 11.843(2),<br>11.843(2),<br>11.843(2)                                  |
| $\beta$ (°)                                                                | 90.00                                                                  | 110.70(2)                            | 90.00                                                                  |
| $V$ (Å <sup>3</sup> )                                                      | 1736(2)                                                                | 1694(2)                              | 1661(2)                                                                |
| $Z$                                                                        | 4                                                                      | 4                                    | 4                                                                      |
| Radiation type                                                             | Mo $K\alpha$                                                           | Mo $K\alpha$                         | Mo $K\alpha$                                                           |
| $\mu$ (mm <sup>-1</sup> )                                                  | 0.91                                                                   |                                      | 1.17                                                                   |
| Crystal size (mm)                                                          | 0.49 × 0.37 × 0.25                                                     | 0.49 × 0.37 × 0.25                   | 0.34 × 0.30 × 0.21                                                     |
| <b>Data collection</b>                                                     |                                                                        |                                      |                                                                        |
| Diffractionmeter                                                           | KUMA KM4 with Sapphire CCD detector                                    | KUMA KM4 with Sapphire CCD detector  | Xcalibur, Ruby, Gemini ultra                                           |
| Absorption correction                                                      | Multi-scan                                                             | Multi-scan                           | Analytical                                                             |
| $T_{\min}, T_{\max}$                                                       | 0.790, 1.000                                                           | 0.439, 1.000                         | 0.714, 0.773                                                           |
| No. of measured, independent and observed [ $I > 2\sigma(I)$ ] reflections | 3179, 149, 140                                                         | 3114, 3114, 2192                     | 1197, 143, 139                                                         |
| $R_{\text{int}}$                                                           | 0.042                                                                  | Dataset merged                       | 0.019                                                                  |
| $(\sin \theta/\lambda)_{\text{max}}$ (Å <sup>-1</sup> )                    | 0.676                                                                  | 0.606                                | 0.681                                                                  |
| <b>Refinement</b>                                                          |                                                                        |                                      |                                                                        |
| $R[F^2 > 2\sigma(F^2)], wR(F^2), S$                                        | 0.031, 0.098, 1.14                                                     | 0.082, 0.249, 1.08                   | 0.039, 0.096, 1.24                                                     |
| No. of reflections                                                         | 149                                                                    | 3114                                 | 143                                                                    |
| No. of parameters                                                          | 19                                                                     | 204                                  | 19                                                                     |
| No. of restraints                                                          | 0                                                                      | 0                                    | 6                                                                      |
| $\Delta\rho_{\text{max}}, \Delta\rho_{\text{min}}$ (e Å <sup>-3</sup> )    | 0.38, -0.32                                                            | 1.68, -0.60                          | 0.32, -0.72                                                            |

**Table S2.** Hydrogen-bond geometry [ $\text{\AA}$ ,  $^\circ$ ] for **AZECr** at 120 K (**AZECr-LT**).

| $D-H\cdots A$                      | $H\cdots A$ | $D\cdots A$ | $D-H\cdots A$ |
|------------------------------------|-------------|-------------|---------------|
| N1A—H1A1 $\cdots$ N2 <sup>i</sup>  | 2.31        | 3.138(8)    | 151           |
| N1A—H1A2 $\cdots$ N4               | 2.20        | 3.000(8)    | 147           |
| N1B—H1B1 $\cdots$ N3               | 2.11        | 2.946(8)    | 152           |
| N1B—H1B2 $\cdots$ N5 <sup>ii</sup> | 2.19        | 3.087(8)    | 169           |

Symmetry codes: (i)  $-x+1, -y, -z+1$ ; (ii)  $-x, -y+1, -z+1$ .

**Table S3.** Selected bond lengths and the shortest Cr $\cdots$ K distances ( $\text{\AA}$ ) for **AZECr-LT** at 120 K.

|                                            |            |
|--------------------------------------------|------------|
| Cr2 <sup>i</sup> $\cdots$ K1 <sup>ii</sup> | 5.8720(9)  |
| Cr2 $\cdots$ K1 <sup>iii</sup>             | 5.9239(13) |
| Cr2 $\cdots$ K1 <sup>i</sup>               | 5.9396(13) |
| Cr1 $\cdots$ K1                            | 5.9971(13) |
| Cr2 <sup>ii</sup> $\cdots$ K1              | 6.0126(13) |
| Cr2 $\cdots$ K1                            | 6.0549(9)  |

Symmetry codes: (i)  $x, y+1, z$ ; (ii)  $x, -y+3/2, z+1/2$ ; (iii)  $x, -y+1/2, z+1/2$ .

**Table S4.** Comparison of the band positions in the infrared (FT-FIR, FT-MIR) spectra at the 290 K for **AZECr** and **AZEFc** compounds (vs-very strong, s-strong, m-medium, br-broad, sh-shoulder, w-weak, vw-very weak).

| IR wavenumbers at 290 K [ $\text{cm}^{-1}$ ] |                     | Tentative assignments                                                   |
|----------------------------------------------|---------------------|-------------------------------------------------------------------------|
| <b>AZECr</b>                                 | <b>AZEFc</b>        |                                                                         |
| 3204 vs                                      | 3197 vs             | $\nu_{\text{as}}$ (N–H) stretching                                      |
| 3119 vs                                      | 3104 vs             | $\nu_{\text{s}}$ (N–H) stretching                                       |
| 2122 s                                       | 2106 s              | $\nu$ (C–N) stretching                                                  |
| 1595 s                                       | 1597 s              | $\delta$ (NH <sub>2</sub> ) bending                                     |
| 1297 s                                       | 1297 s              | $\omega$ (CH <sub>2</sub> ) wagging                                     |
| 1255 s                                       | 1255 s              | $\rho$ (CH <sub>2</sub> ) rocking + $\omega$ (NH <sub>2</sub> ) wagging |
| 953 m                                        | 953 m               | $\nu$ (C–C ring) stretching                                             |
| 929 w                                        |                     | $\nu$ (C–C ring) stretching                                             |
| 906 m                                        | 907 m               | $\nu$ (C–C ring) stretching + $\rho$ (NH <sub>2</sub> ) rocking         |
| 455 m                                        | 505 vw, br          | $\nu$ (M–C) stretching                                                  |
| 339 m                                        | 393 m               | $\delta$ (M–C–N) bending                                                |
| 141 m, br                                    | 161, 149, 133 m, br | $\delta$ (C–M–C) bending + $\nu_{\text{L}}$ (lattice)                   |
